# Supplementary material for: Variable susceptibility of intestinal organoid–derived monolayers to SARS-CoV-2 infection
Source: PubMed Central journal article supplement (PMC9004766; doi:10.1371/journal.pbio.3001592), 2022-03-31
Supplement: pbio.3001592.s011.pdf [file pbio.3001592.s011.pdf]

**S1 Table. Subject information for human endoscopic specimens.** M, male; F, female; IBD, inflammatory bowel disease; CD, Crohn's disease; UC, ulcerative colitis; SNP, single nucleotide polymorphism; ND, not detected; NA, not attempted.

| Name | Tissue          | Sex | Age | Disease type | Inflammation | ACE2 SNP |
|------|-----------------|-----|-----|--------------|--------------|----------|
| SI1  | Terminal ileum  | M   | 34  | Non-IBD      | Non-inflamed | NA       |
| SI2  | Terminal ileum  | M   | 24  | CD           | Non-inflamed | NA       |
| SI3  | Terminal ileum  | F   | 47  | Non-IBD      | Non-inflamed | ND       |
| SI4  | Terminal ileum  | M   | 23  | CD           | Non-inflamed | ND       |
| SI5  | Terminal ileum  | M   | 37  | CD           | Non-inflamed | NA       |
| SI6  | Terminal ileum  | F   | 25  | Non-IBD      | Non-inflamed | NA       |
| SI7  | Terminal ileum  | M   | 29  | Non-IBD      | Non-inflamed | ND       |
| SI8  | Terminal ileum  | M   | 47  | IBD          | Non-inflamed | ND       |
| SI9  | Terminal ileum  | F   | 37  | CD           | Non-inflamed | NA       |
| SI10 | Terminal ileum  | F   | 69  | CD           | Non-inflamed | ND       |
| SI11 | Terminal ileum  | F   | 23  | Non-IBD      | Non-inflamed | NA       |
| SI12 | Terminal ileum  | M   | 39  | CD           | Non-inflamed | NA       |
| C1   | Ascending colon | M   | 34  | Non-IBD      | Non-inflamed | ND       |
| C2   | Ascending colon | M   | 25  | Non-IBD      | Non-inflamed | NA       |
| C3   | Ascending colon | F   | 55  | UC           | Non-inflamed | NA       |
| C4   | Ascending colon | F   | 27  | UC           | Non-inflamed | NA       |
| C5   | Ascending colon | M   | 29  | Non-IBD      | Non-inflamed | ND       |
| C6   | Ascending colon | M   | 33  | UC           | Non-inflamed | NA       |
| C7   | Ascending colon | M   | 33  | UC           | Non-inflamed | ND       |
| C8   | Ascending colon | F   | 23  | Non-IBD      | Non-inflamed | ND       |
| C9   | Ascending colon | M   | 24  | CD           | Non-inflamed | NA       |
| C10  | Ascending colon | M   | 37  | CD           | Non-inflamed | NA       |
| C11  | Ascending colon | F   | 37  | CD           | Non-inflamed | NA       |
| C12  | Ascending colon | M   | 21  | UC           | Non-inflamed | NA       |
| C13  | Ascending colon | F   | 20  | UC           | Non-inflamed | ND       |
