# Supplementary material for: Variable susceptibility of intestinal organoid–derived monolayers to SARS-CoV-2 infection
Source: PubMed Central journal article supplement (PMC9004766; doi:10.1371/journal.pbio.3001592), 2022-03-31
Supplement: pbio.3001592.s012.pdf [file pbio.3001592.s012.pdf]

**S2 Table. Correlation between subject age and gene expression among the organoid monolayers grown in differentiation media for 7 days.** *r*, Pearson correlation coefficient; *P*, *P*-value; SI, small intestine.

| Gene expression | Age        |          |          |          |          |          |
|-----------------|------------|----------|----------|----------|----------|----------|
|                 | SI + Colon |          | SI       |          | Colon    |          |
|                 | <i>r</i>   | <i>P</i> | <i>r</i> | <i>P</i> | <i>r</i> | <i>P</i> |
| <i>ACE2</i>     | -0.056     | 0.790    | -0.329   | 0.296    | 0.323    | 0.282    |
| <i>TMPRSS2</i>  | -0.122     | 0.562    | -0.144   | 0.656    | 0.068    | 0.826    |
| <i>TMPRSS4</i>  | -0.018     | 0.931    | 0.158    | 0.626    | 0.320    | 0.287    |
| <i>APOA1</i>    | 0.187      | 0.371    | 0.041    | 0.900    | -0.235   | 0.439    |
| <i>ISG15</i>    | -0.203     | 0.330    | -0.243   | 0.446    | -0.145   | 0.636    |
| <i>OASL</i>     | 0.004      | 0.985    | -0.196   | 0.541    | 0.263    | 0.386    |
| <i>MX2</i>      | 0.077      | 0.717    | 0.157    | 0.626    | -0.018   | 0.953    |
