# Supplementary material for: Variable susceptibility of intestinal organoid–derived monolayers to SARS-CoV-2 infection
Source: PubMed Central journal article supplement (PMC9004766; doi:10.1371/journal.pbio.3001592), 2022-03-31
Supplement: pbio.3001592.s013.pdf [file pbio.3001592.s013.pdf]

**S3 Table. Correlation of subject age or PFU of SARS-CoV-2 with ISG induction in organoids stimulated with IFN $\beta$  (100 or 300 IU/ml) or IFN $\lambda$ 2 (10 or 30 ng/ml) for 12 hrs.** r, Pearson correlation coefficient; P, P-value; SI, small intestine. \* $P \leq 0.05$  and \*\*\* $P \leq 0.001$  by simple regression analysis.

| Gene induction           | Age    |          |        |       | SARS-CoV-2 replication |       |        |        |
|--------------------------|--------|----------|--------|-------|------------------------|-------|--------|--------|
|                          | SI     |          | Colon  |       | SI                     |       | Colon  |        |
|                          | r      | P        | r      | P     | r                      | P     | r      | P      |
| <i>ISG15</i>             |        |          |        |       |                        |       |        |        |
| 100 IU/ml IFN $\beta$    | 0.384  | 0.218    | 0.076  | 0.806 | 0.109                  | 0.736 | 0.146  | 0.633  |
| 300 IU/ml IFN $\beta$    | 0.311  | 0.326    | 0.041  | 0.894 | -0.079                 | 0.806 | -0.148 | 0.630  |
| 10 ng/ml IFN $\lambda$ 2 | 0.433  | 0.160    | -0.206 | 0.499 | -0.071                 | 0.827 | -0.131 | 0.671  |
| 30 ng/ml IFN $\lambda$ 2 | 0.457  | 0.135    | -0.082 | 0.791 | -0.393                 | 0.206 | -0.028 | 0.927  |
| <i>OASL</i>              |        |          |        |       |                        |       |        |        |
| 100 IU/ml IFN $\beta$    | 0.835  | 0.001*** | -0.344 | 0.250 | -0.424                 | 0.169 | -0.033 | 0.916  |
| 300 IU/ml IFN $\beta$    | 0.668  | 0.018*   | 0.103  | 0.738 | -0.300                 | 0.344 | -0.096 | 0.755  |
| 10 ng/ml IFN $\lambda$ 2 | 0.538  | 0.071    | -0.173 | 0.572 | -0.404                 | 0.193 | -0.110 | -0.720 |
| 30 ng/ml IFN $\lambda$ 2 | 0.623  | 0.030*   | 0.430  | 0.143 | -0.274                 | 0.390 | -0.163 | 0.596  |
| <i>MX2</i>               |        |          |        |       |                        |       |        |        |
| 100 IU/ml IFN $\beta$    | -0.250 | 0.432    | -0.102 | 0.741 | 0.308                  | 0.331 | 0.006  | 0.985  |
| 300 IU/ml IFN $\beta$    | -0.128 | 0.691    | -0.057 | 0.853 | 0.250                  | 0.433 | 0.015  | 0.689  |
| 10 ng/ml IFN $\lambda$ 2 | -0.311 | 0.326    | -0.150 | 0.626 | 0.091                  | 0.779 | -0.194 | 0.526  |
| 30 ng/ml IFN $\lambda$ 2 | 0.239  | 0.454    | -0.091 | 0.768 | 0.171                  | 0.595 | 0.013  | 0.966  |
