# Supplementary material for: Variable susceptibility of intestinal organoid–derived monolayers to SARS-CoV-2 infection
Source: PubMed Central journal article supplement (PMC9004766; doi:10.1371/journal.pbio.3001592), 2022-03-31

Fig 4A

**MW**  
**(kDa)**

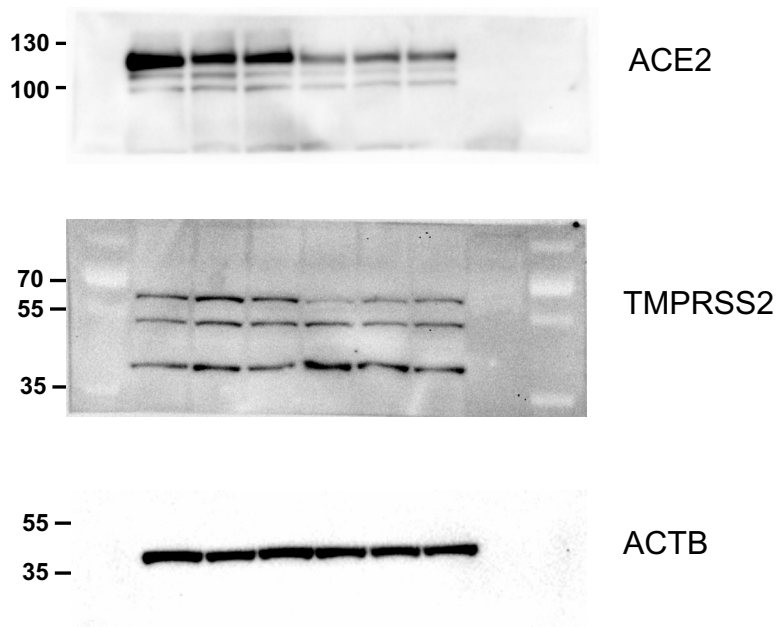

S8D Fig

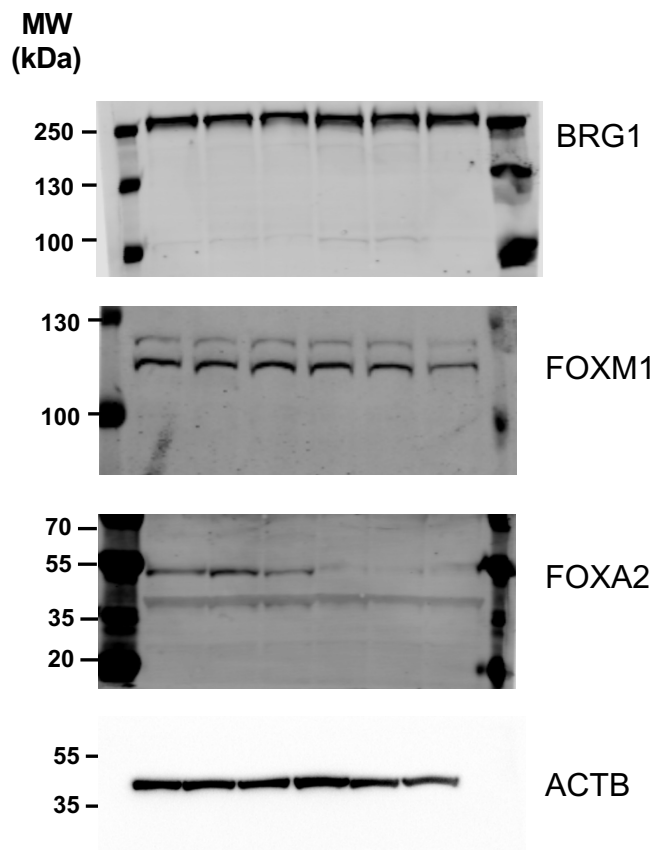

Supplement: pbio.3001592.s014.pdf [file pbio.3001592.s014.pdf]
